# Supplementary material for: Characterization and antiviral susceptibility of SARS-CoV-2 Omicron/BA.2
Source: PubMed Central journal article supplement (PMC8887076; doi:10.21203/rs.3.rs-1375091/v1), 2022-02-24

# Extended Data Figure 1

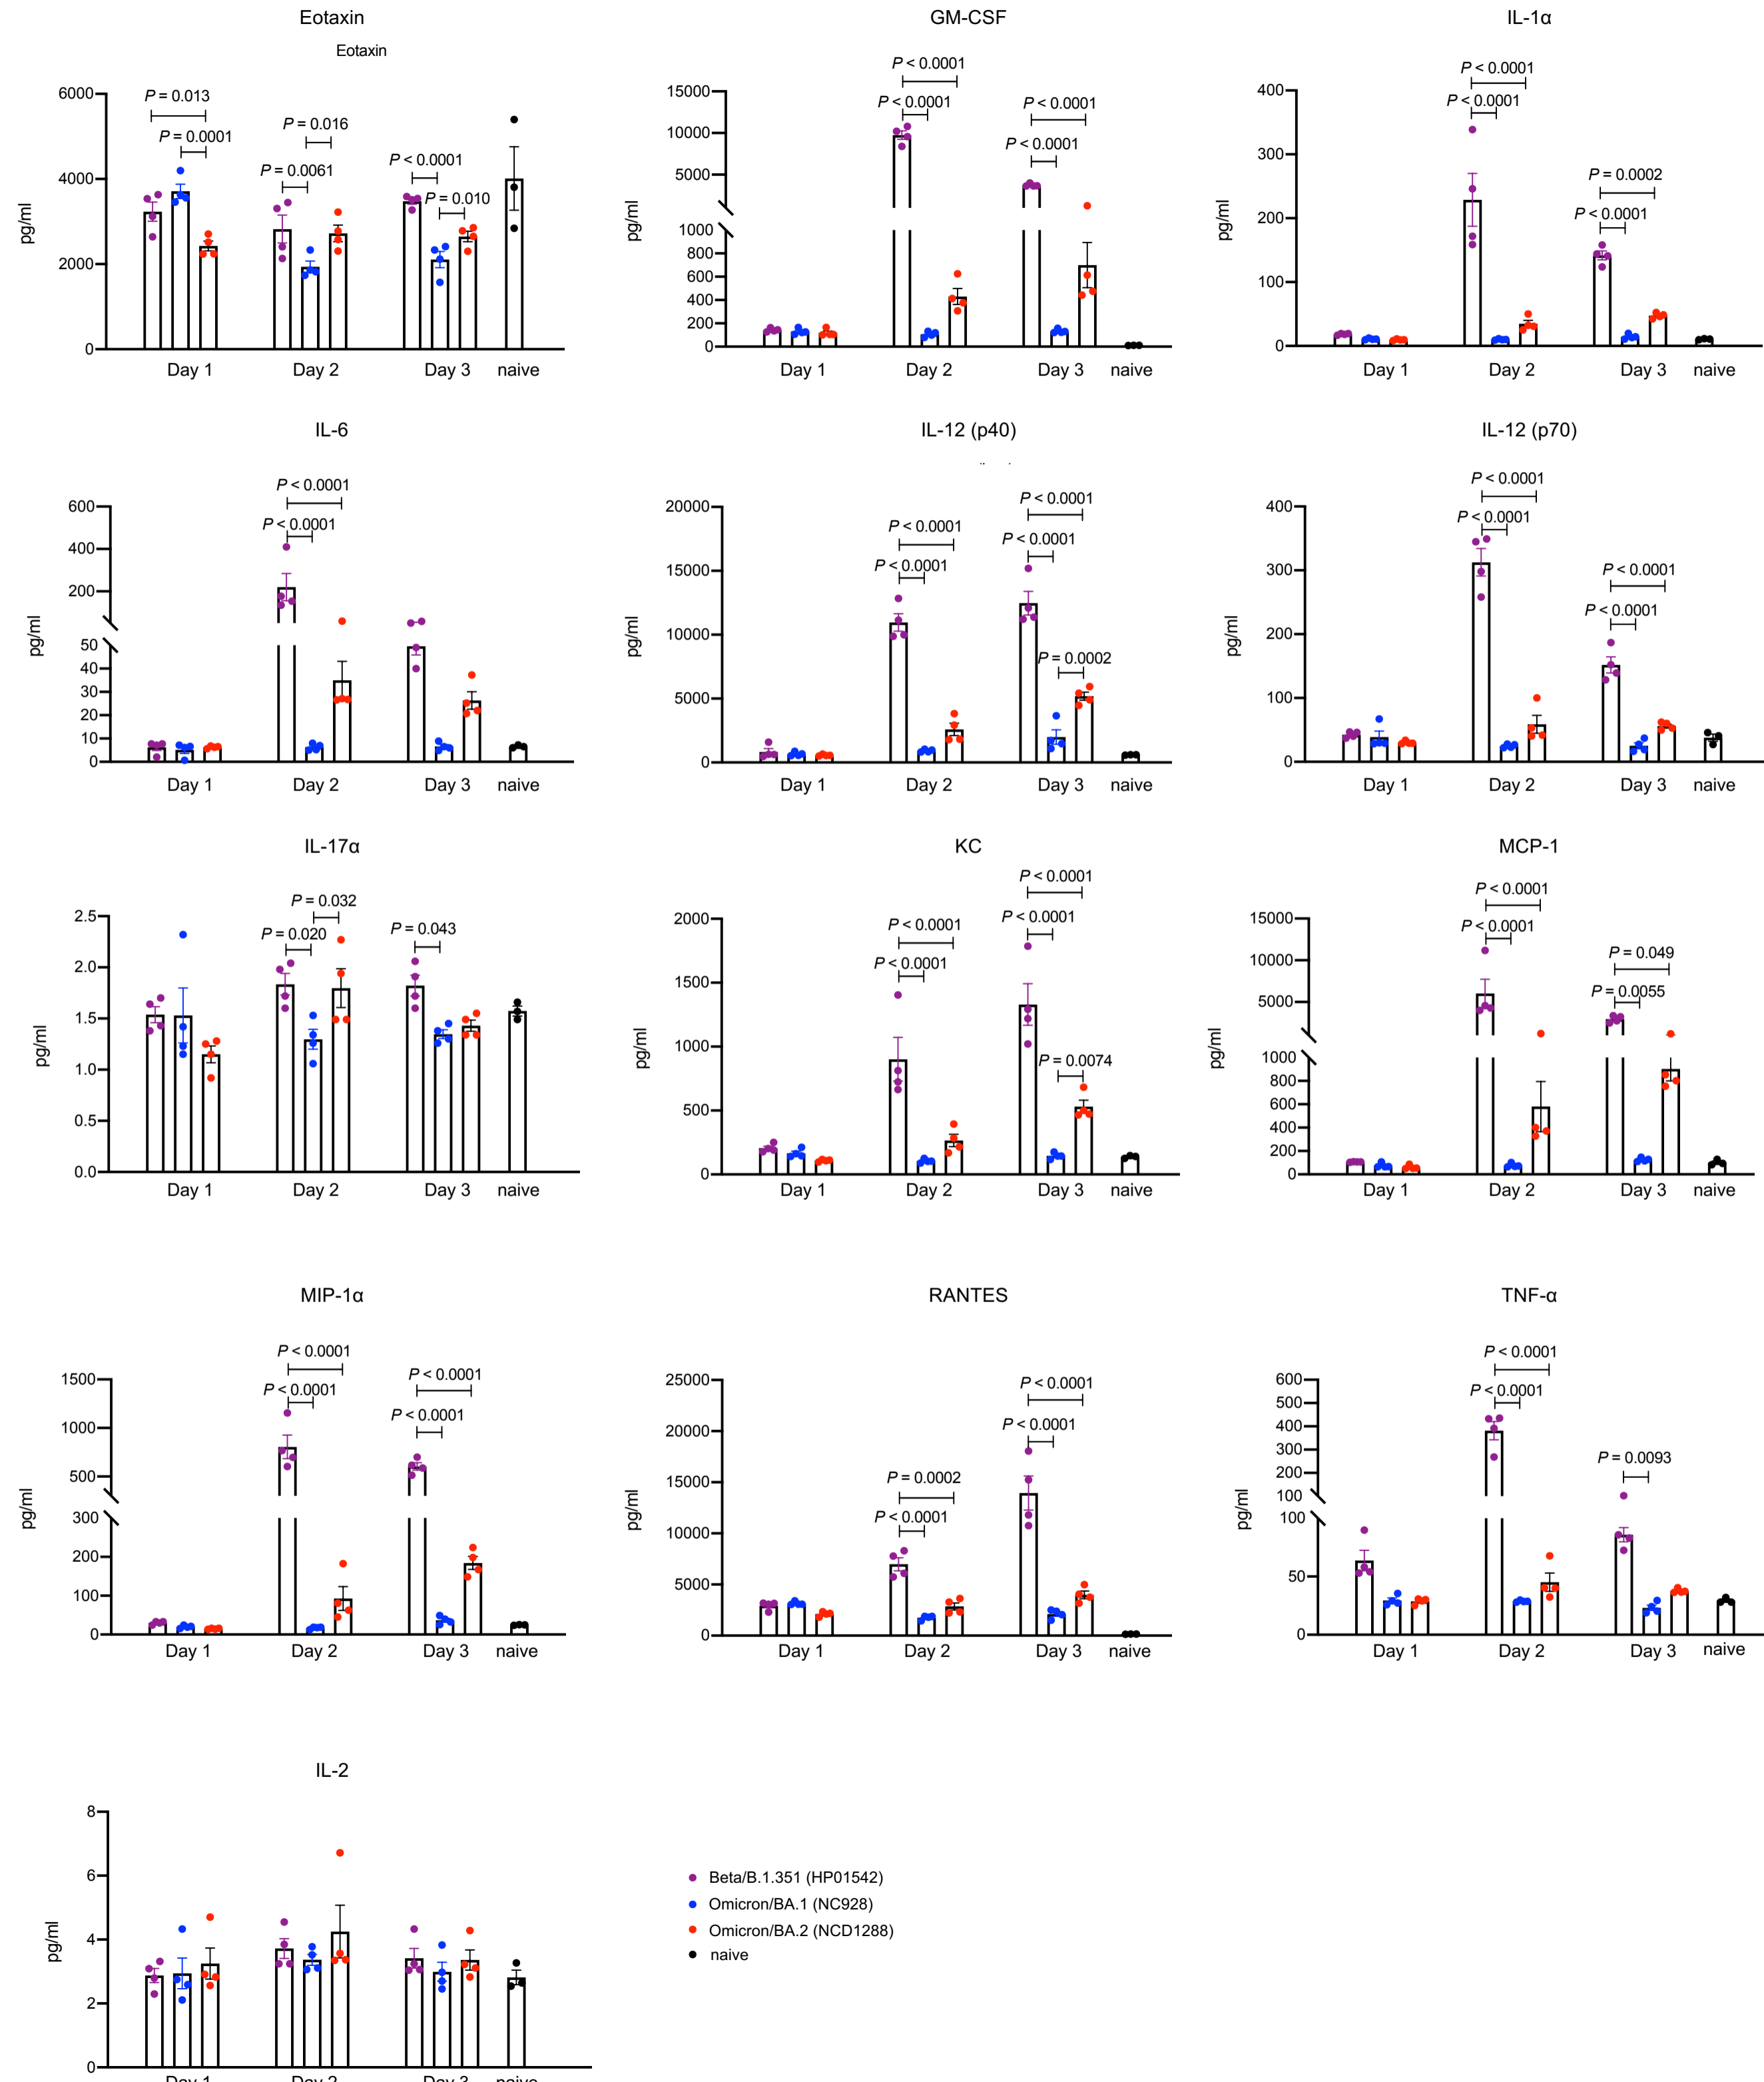

# Extended Data Figure 2

**a**

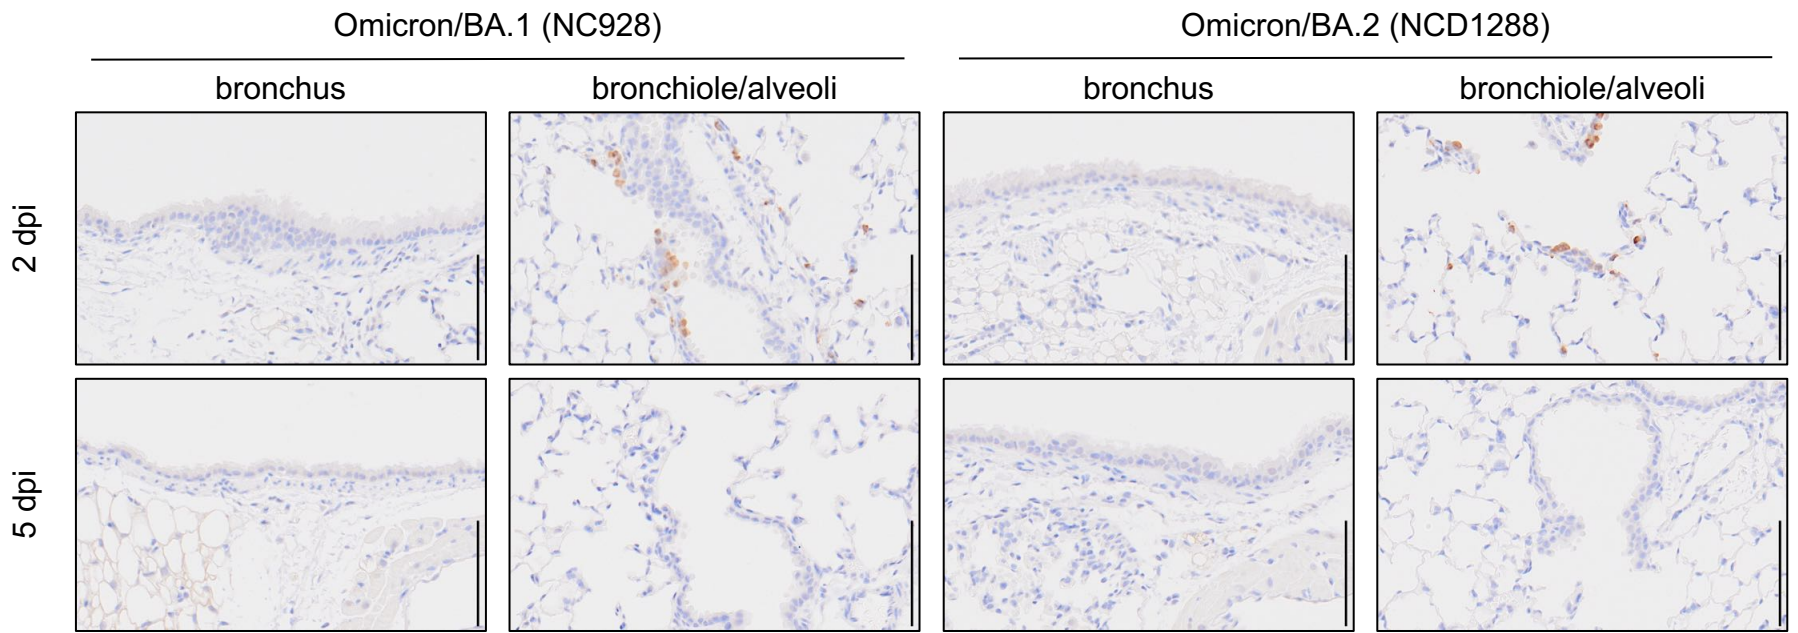

**b**

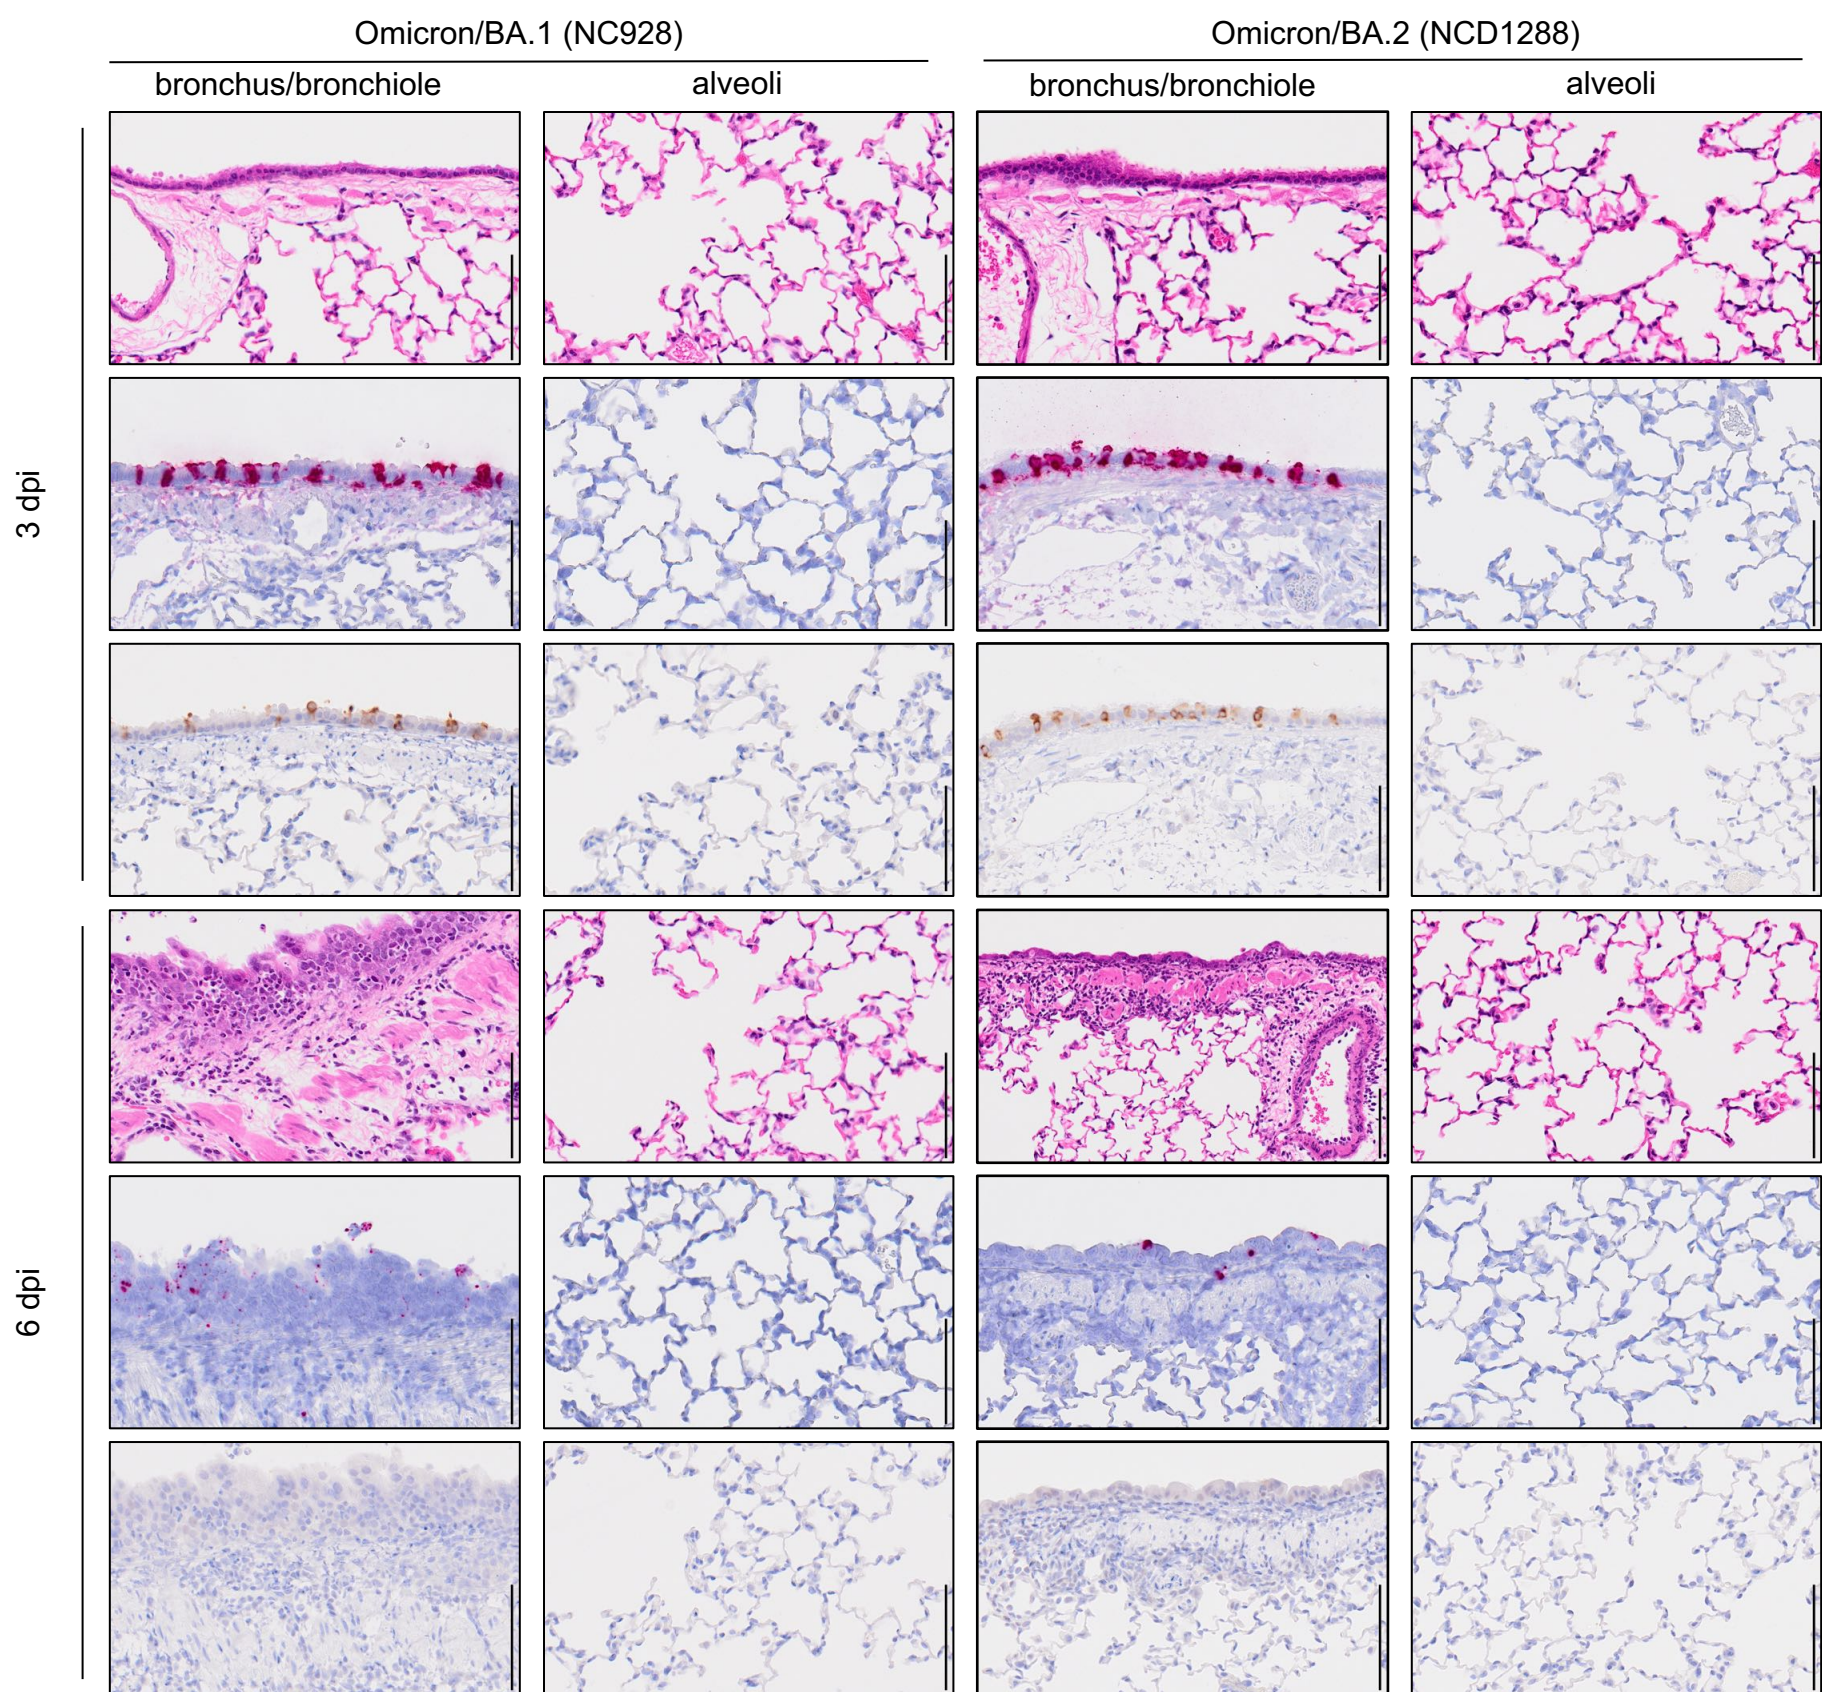

**c**

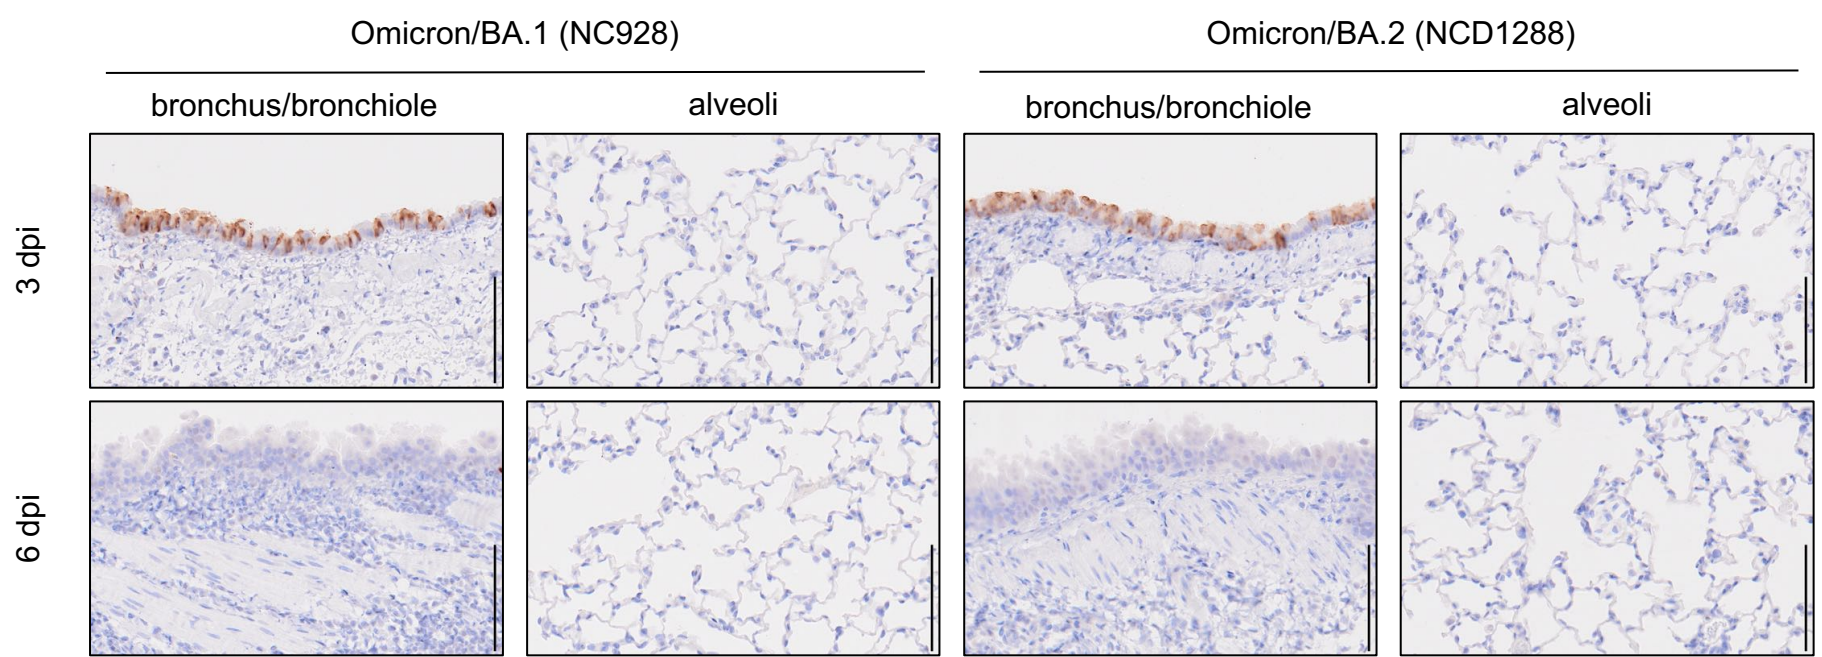

# Extended Data Figure 3

## 10<sup>3</sup> PFU infection

Omicron/BA.1 (NC928)

Omicron/BA.2 (NCD1288)

#1

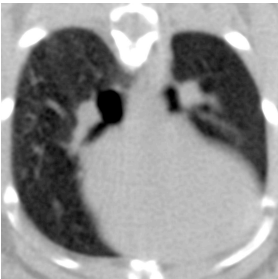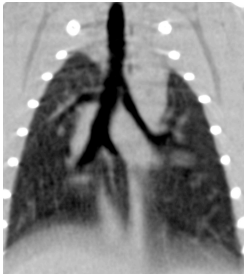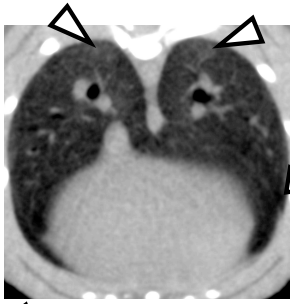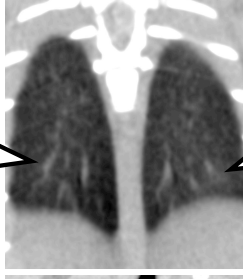

#2

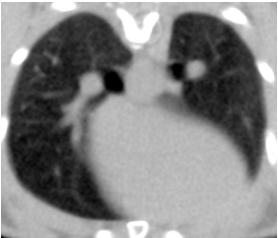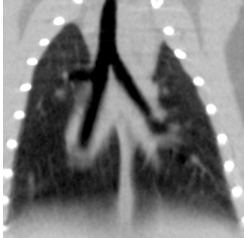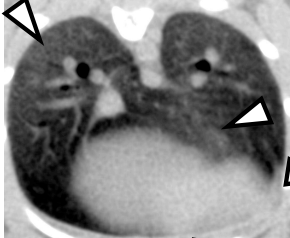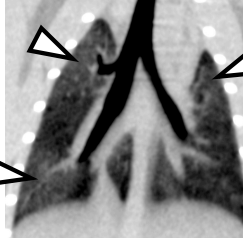

#3

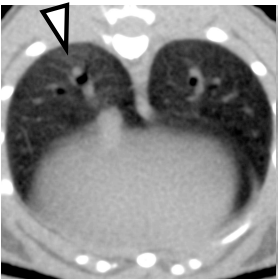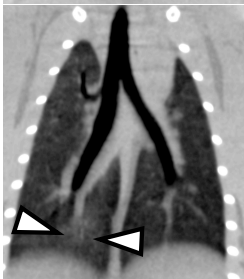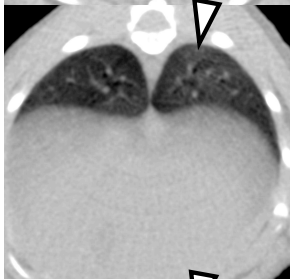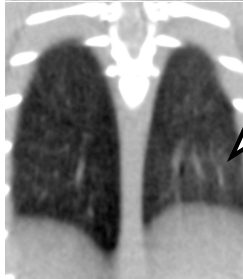

#4

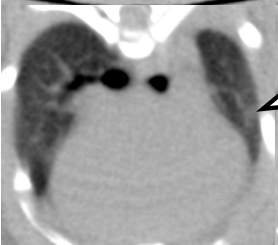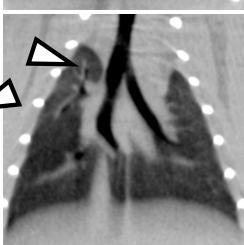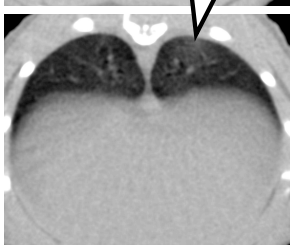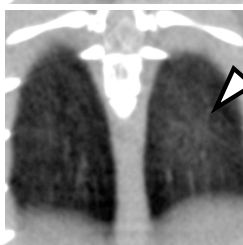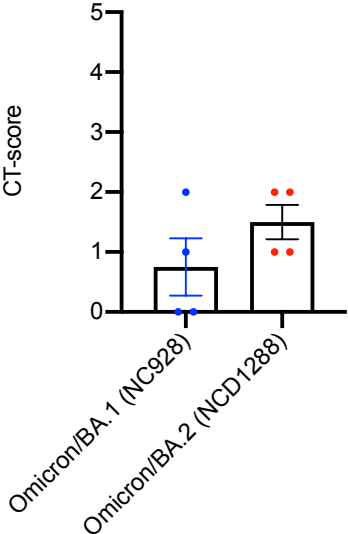

Supplement: 5c8f9a88613e8c6752b6c01e.pdf [file 5c8f9a88613e8c6752b6c01e.pdf]
