# Supplementary material for: Characterization and antiviral susceptibility of SARS-CoV-2 Omicron/BA.2
Source: Res Sq. 2022 Feb 24:rs.3.rs-1375091. Preprint. [Version 1] doi: 10.21203/rs.3.rs-1375091/v1 (PMC8887076; doi:10.21203/rs.3.rs-1375091/v1)
Supplement: Supplement 2 [file 7de6a5cc0aeeb949857e59cb.xlsx]

## Sheet: Extended Data Table 1
	Extended Data Table 1. Alignment of Key Sequence Changes in the Omicron/BA.2 Isolate
	Gene	Nucleotide change	Aminod acid change	Frequency
	ORF1ab	T670G	Ser135Arg	99.8391
	ORF1ab	C2790T	Thr842Ile	99.6183
	ORF1ab	G4184A	Gly1307Ser	99.7431
	ORF1ab	C9344T	Leu3027Phe	99.8472
	ORF1ab	C9534T	Thr3090Ile	99.9006
	ORF1ab	C9866T	Leu3201Phe	99.7947
	ORF1ab	C10029T	Thr3255Ile	99.8038
	ORF1ab	C10449A	Pro3395His	99.8917
	ORF1ab	11288..11296del	Ser3675_Phe3677del	99.658
	ORF1ab	T11522G	Phe3753Val	19.4702
	ORF1ab	C13436T	Leu4391Phe	20.7363
	ORF1ab	C14408T	Pro4715Leu	99.8397
	ORF1ab	G15452T	Gly5063Val	99.8318
	ORF1ab	T16342C	Ser5360Pro	99.8913
	ORF1ab	C16948T	Pro5562Ser	22.7685
	ORF1ab	C17410T	Arg5716Cys	99.8583
	ORF1ab	A18163G	Ile5967Val	99.9267
	ORF1ab	C19955T	Thr6564Ile	99.947
	ORF1ab	C21005T	Ala6914Val	16.899
	S	C21618T	Thr19Ile	99.7923
	S	21633..21641del	Leu24_Ala27delinsSer	100
	S	G21987A	Gly142Asp	99.9483
	S	T22200G	Val213Gly	99.8158
	S	G22578A	Gly339Asp	99.9353
	S	C22674T	Ser371Phe	99.8037
	S	T22679C	Ser373Pro	99.947
	S	C22686T	Ser375Phe	99.9191
	S	A22688G	Thr376Ala	99.8386
	S	G22775A	Asp405Asn	99.9179
	S	A22786C	Arg408Ser	99.0135
	S	G22813T	Lys417Asn	99.8469
	S	T22882G	Asn440Lys	99.7924
	S	G22992A	Ser477Asn	100
	S	C22995A	Thr478Lys	99.8746
	S	A23013C	Glu484Ala	99.8545
	S	A23040G	Gln493Arg	99.9161
	S	A23055G	Gln498Arg	99.8513
	S	A23063T	Asn501Tyr	99.8288
	S	T23075C	Tyr505His	99.6213
	S	A23403G	Asp614Gly	99.8934
	S	C23525T	His655Tyr	99.7919
	S	T23599G	Asn679Lys	99.9463
	S	C23604A	Pro681His	99.8241
	S	C23854A	Asn764Lys	99.6205
	S	G23948T	Asp796Tyr	99.7409
	S	A24424T	Gln954His	99.5061
	S	T24469A	Asn969Lys	99.9558
	ORF3a	C26060T	Thr223Ile	99.9167
	E	C26270T	Thr9Ile	99.9163
	M	C26577G	Gln19Glu	99.956
	M	G26709A	Ala63Thr	99.7955
	ORF6	GAT27382..27384CTC	Asp61Leu	99.8723
	N	C28311T	Pro13Leu	99.8499
	N	28362..28370del	Glu31_Ser33del	99.7646
	N	GGG28881..28883AAC	Arg203_Gly204delinsLysArg	99.9549
	N	A29510C	Ser413Arg	99.8941
